# Supplementary material for: Spray-coated PEDOT:OTf films: thermoelectric properties and integration into a printed thermoelectric generator
Source: Royal Society of Chemistry journal article supplement (doi:10.1039/d0qm00265h), 2020-01-01
Supplement: d0qm00265h1.pdf [file d0qm00265h1.pdf]

# Spray-coated PEDOT:OTf films: Thermoelectric properties and integration into a printed thermoelectric generator

*Etienne YVENOU<sup>a</sup>, Martina SANDRONI<sup>a,b</sup>, Alexandre CARELLA<sup>a,\*</sup>, Magatte N. GUEYE<sup>a,b</sup>,  
Jérôme FAURE-VINCENT<sup>b</sup>, Stéphanie POUGET<sup>c</sup>, Renaud DEMADRILLE<sup>b</sup>, and Jean-Pierre  
SIMONATO<sup>a,d,\*</sup>*

<sup>a</sup> Univ. Grenoble Alpes, CEA, LITEN, DTNM, F-38000 Grenoble, France

<sup>b</sup> Univ. Grenoble Alpes, CEA, CNRS, IRIG, SYMMES, F-38000 Grenoble, France

<sup>c</sup> Univ. Grenoble Alpes, CEA, CNRS, IRIG, MEM, F-38000 Grenoble, France

<sup>d</sup> Duke University, Department of Chemistry, Durham, NC 27708, USA

E-mail addresses: alexandre.carella@cea.fr; jean-pierre.simonato@cea.fr

\* Corresponding authors

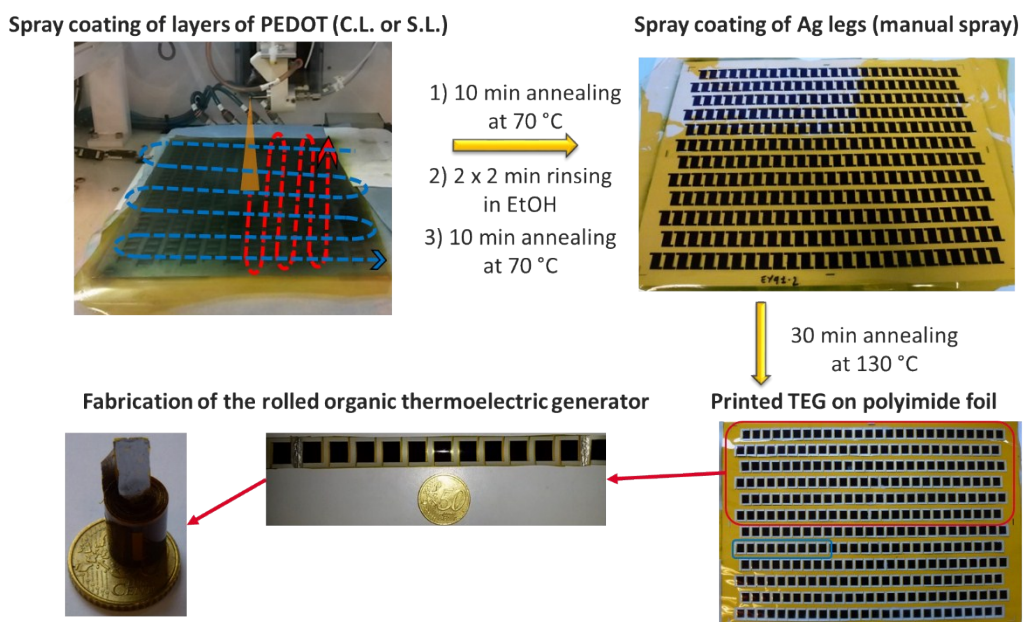

**Figure S1.** Description of PEDOT films and organic thermoelectric generators preparation

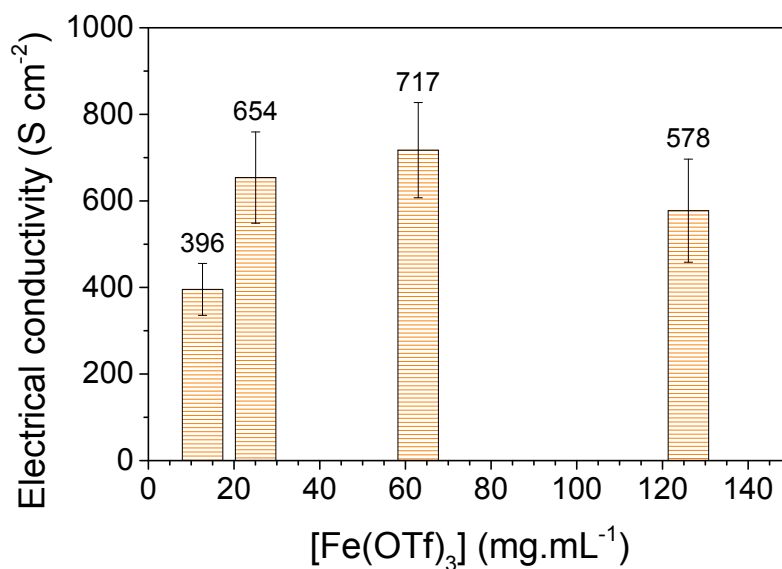

**Figure S2.** Electrical conductivity of PEDOT:OTf films spray-coated on glass at 12.6, 25.2, 63 and 126 g.L<sup>-1</sup> of oxidant (Fe(OTf)<sub>3</sub>) in ethanol containing 10% wt PEG-PPG-PEG.

**Table S1.** Experimental data on the thickness, the electrical conductivity, the Seebeck coefficient and the calculated power factor for PEDOT:OTf films deposited using different concentrations of NMP in the oxidizing solution. \* The relative error for the determination of Seebeck coefficients is estimated at 10%.

| <b>[NMP]<br/>(%)</b> | <b>Thickness<br/>(nm)</b> | <b><math>\sigma</math><br/>(S cm<sup>-1</sup>)</b> | <b>Seebeck coefficient*<br/>(<math>\mu</math>V.K<sup>-1</sup>)</b> | <b>Power factor<br/>(<math>\mu</math>W.m<sup>-1</sup>.K<sup>-2</sup>)</b> |
|----------------------|---------------------------|----------------------------------------------------|--------------------------------------------------------------------|---------------------------------------------------------------------------|
| 0                    | 792 $\pm$ 190             | 805 $\pm$ 261                                      | 15.4                                                               | 19 $\pm$ 6                                                                |
| 0.5                  | 565 $\pm$ 60              | 797 $\pm$ 109                                      | 16.9                                                               | 23 $\pm$ 3                                                                |
| 1                    | 461 $\pm$ 116             | 821 $\pm$ 239                                      | 19.9                                                               | 33 $\pm$ 10                                                               |
| 2                    | 540 $\pm$ 126             | 1090 $\pm$ 278                                     | 17.9                                                               | 35 $\pm$ 9                                                                |
| 3                    | 538 $\pm$ 149             | 1246 $\pm$ 387                                     | 17.0                                                               | 36 $\pm$ 11                                                               |
| 4                    | 280 $\pm$ 64              | 1422 $\pm$ 417                                     | 19.9                                                               | 56 $\pm$ 16                                                               |
| 5                    | 149 $\pm$ 31              | 2278 $\pm$ 620                                     | 21.5                                                               | 105 $\pm$ 28                                                              |
| 6                    | 61 $\pm$ 15               | 202 $\pm$ 64                                       | 16.5                                                               | 5 $\pm$ 2                                                                 |

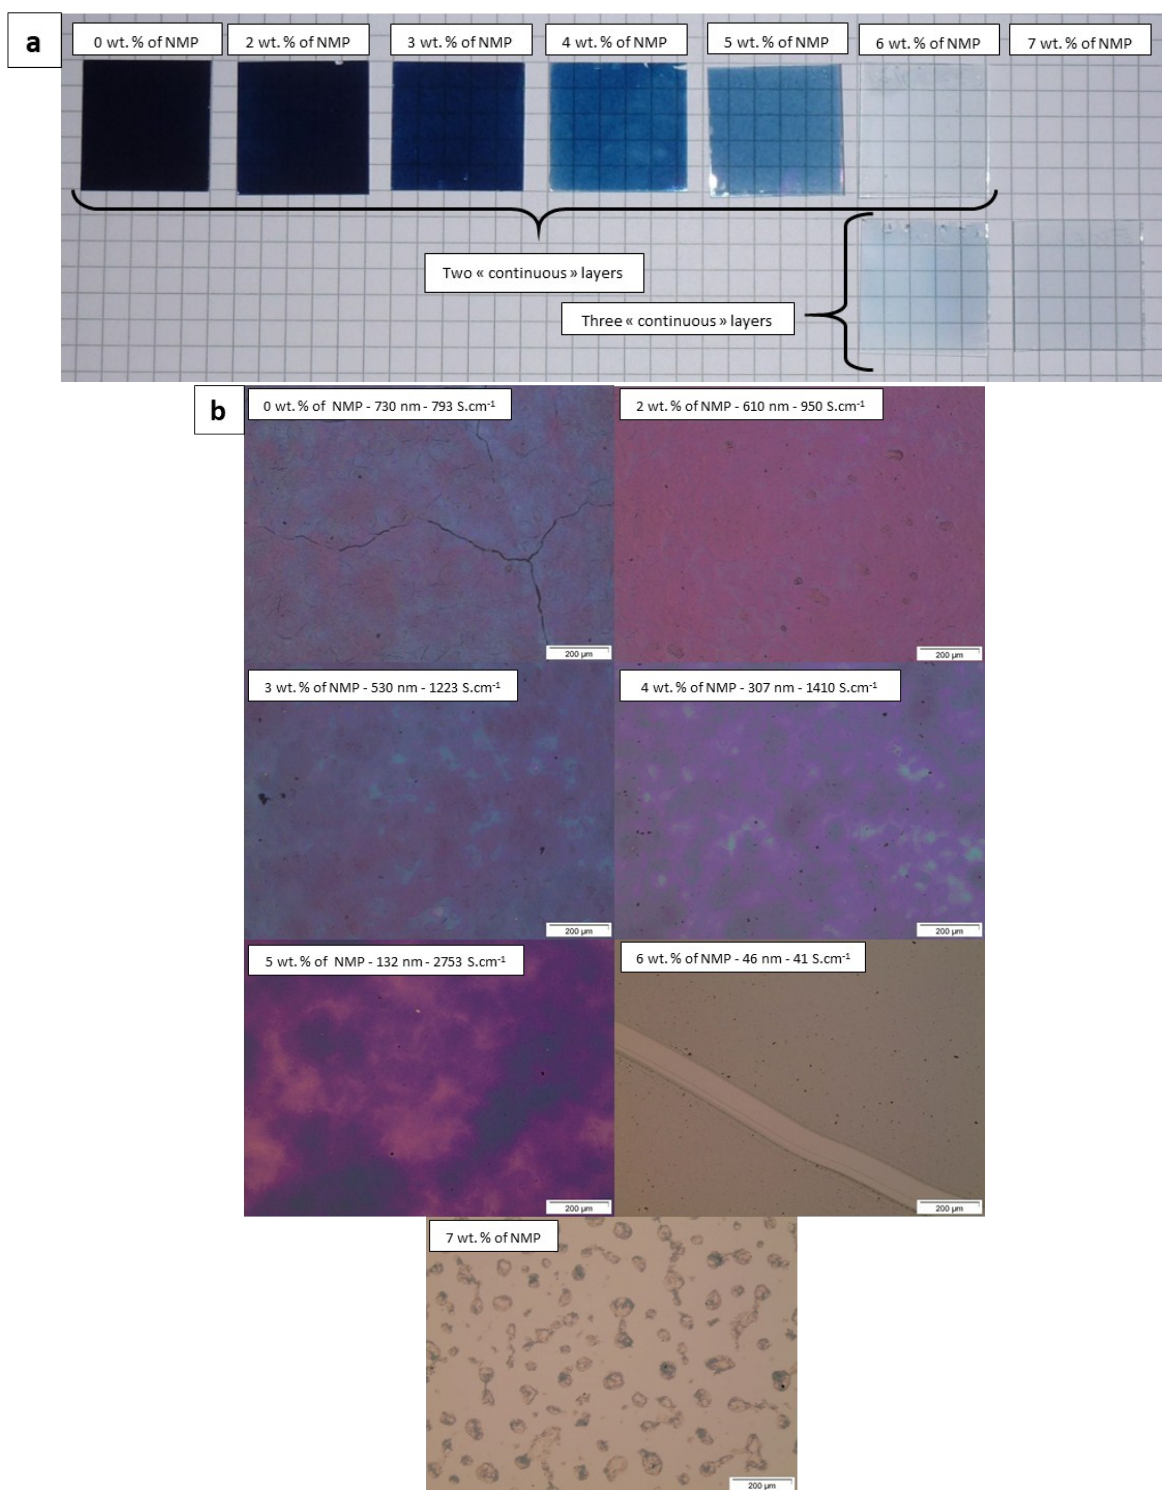

**Figure S3.** (a) Macroscopic aspect of spray-coated PEDOT:OTf films with increasing amounts of NMP and (b) Optical microscopic images of the same spray-coated films (insets indicate NMP amount, thickness and electrical conductivity).

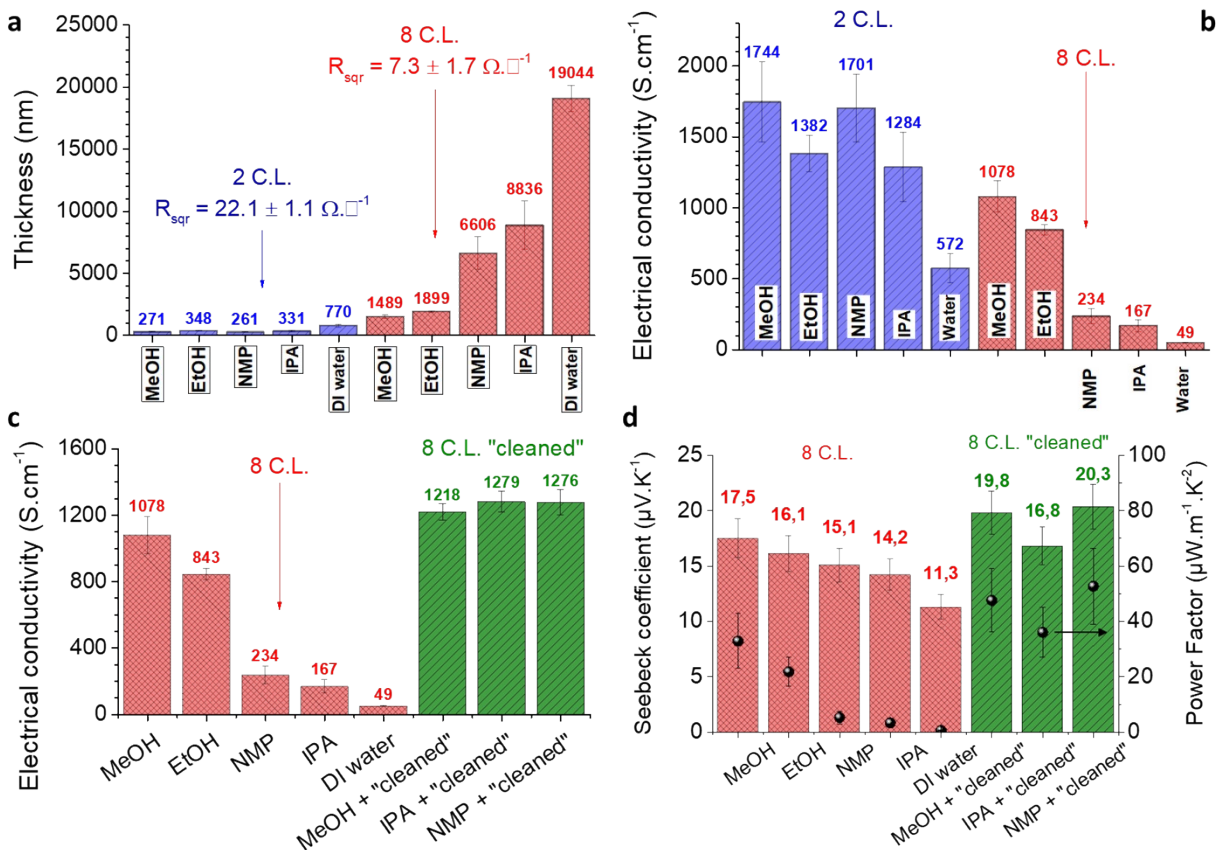

**Figure S4.** (a) Thickness and (b) electrical conductivity for two groups of samples. One of PEDOT:OTf thin (2 C.L.) films and one of thick (8 C.L.) films cleaned with various solvents (methanol, ethanol, N-methylpyrrolidone, isopropanol and deionized water). (c) Electrical conductivity, (d) Seebeck coefficient and power factor of samples post-treated 10 minutes in MeOH and labelled “cleaned” (green histograms).

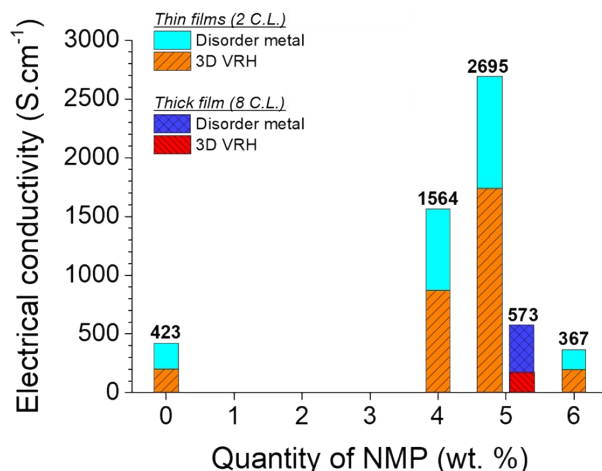

**Figure S5.** Electrical conductivity contribution at  $T = 300$  K in the amorphous phase for thin films (2 C.L.) with various quantity of NMP and one thick film (8 C.L.) with residual PEG-PPG-PEG. Each contribution was calculated thanks to equation (1) with fitting parameters from Table S4.

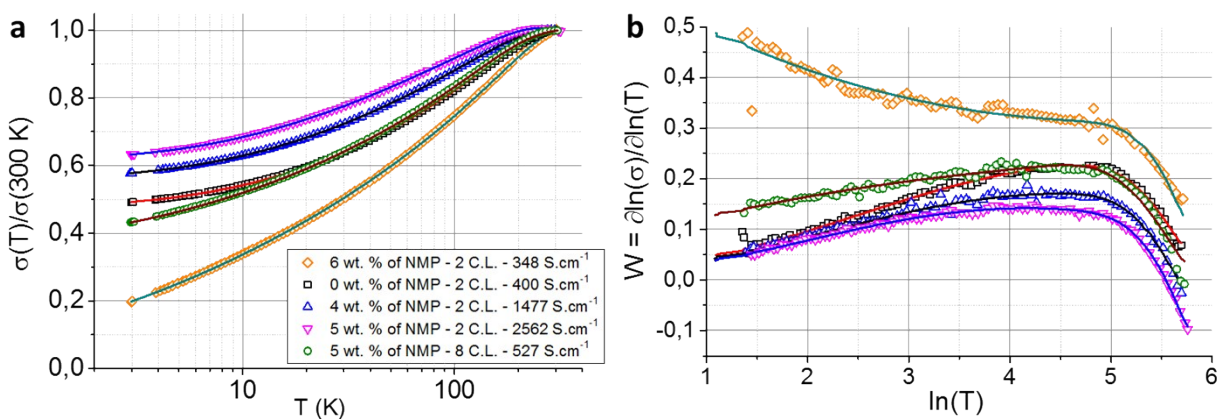

**Figure S6.** (a) Normalized conductivity temperature dependence of two continuous layers films of spray-coated PEDOT:OTf and synthesized with 0, 4, 5 and 6 wt. % of NMP and one thick film (empty red circle) of 8 continuous layers cleaned (symbols) and heterogeneous model of conduction (solid lines). (b) Evolution of the reduced activation energy of the same samples with  $\ln(T)$ .

**Table S2.** Results of the adjustment of an asymmetrical pseudo-Voigt profile function to the first and second order diffraction peaks associated to the lamellar stacking.

|             |                             | <i>Bragg position (<math>\text{\AA}^{-1}</math>)</i> | <i>FWHM(<math>\text{\AA}^{-1}</math>)</i> |
|-------------|-----------------------------|------------------------------------------------------|-------------------------------------------|
| <b>2 CL</b> | <i>1<sup>st</sup> order</i> | 0.467(2)                                             | 0.081(5)                                  |
|             | <i>2<sup>nd</sup> order</i> | 0.919(4)                                             | 0.114 (8)                                 |
| <b>8 SL</b> | <i>1<sup>st</sup> order</i> | 0.458(2)                                             | 0.118(5)                                  |
|             | <i>2<sup>nd</sup> order</i> | 0.914(4)                                             | 0.146(8)                                  |
| <b>8 CL</b> | <i>1<sup>st</sup> order</i> | 0.458(4)                                             | 0.090(8)                                  |
|             | <i>2<sup>nd</sup> order</i> | 0.914(4)                                             | 0.109(8)                                  |

**Table S3.** Fitting parameters from equation 1 in the main article and used to fit experimental data on Figure S5. “# C.L.” is the number of continuous spray-coated layers.

| <i>General properties</i> |               |                                          | <i>1D-metal</i>                       |                         | <i>Disordered metal</i>         |                                        | <i>3D VRH</i>                    |                         |
|---------------------------|---------------|------------------------------------------|---------------------------------------|-------------------------|---------------------------------|----------------------------------------|----------------------------------|-------------------------|
| <i>NMP</i>                | <i># C.L.</i> | <i><math>\sigma(300\text{ K})</math></i> | <i><math>\sigma_{1D-metal}</math></i> | <i><math>T_m</math></i> | <i><math>\sigma_{DM}</math></i> | <i><math>m</math></i>                  | <i><math>\sigma_0(3D)</math></i> | <i><math>T_0</math></i> |
| <i>wt. %</i>              | -             | <i><math>S.cm^{-1}</math></i>            | <i><math>S.cm^{-1}</math></i>         | <i>K</i>                | <i><math>S.cm^{-1}</math></i>   | <i><math>S.cm^{-1} K^{-1/2}</math></i> | <i><math>S.cm^{-1}</math></i>    | <i>K</i>                |
| 0                         | 2             | 400                                      | 460                                   | 813                     | 186                             | 2,1                                    | 1020                             | 2092                    |
| 4                         | 2             | 1477                                     | 1327                                  | 905                     | 829                             | -7,8                                   | 3697                             | 1314                    |
| 5                         | 2             | 2562                                     | 1564                                  | 1056                    | 1599                            | -37,2                                  | 6964                             | 1106                    |
| 6                         | 2             | 348                                      | 219                                   | 1039                    | 0                               | 10                                     | 359                              | 42                      |
| 5                         | 8             | 527                                      | 585                                   | 715                     | 179                             | 12,6                                   | 422                              | 175                     |



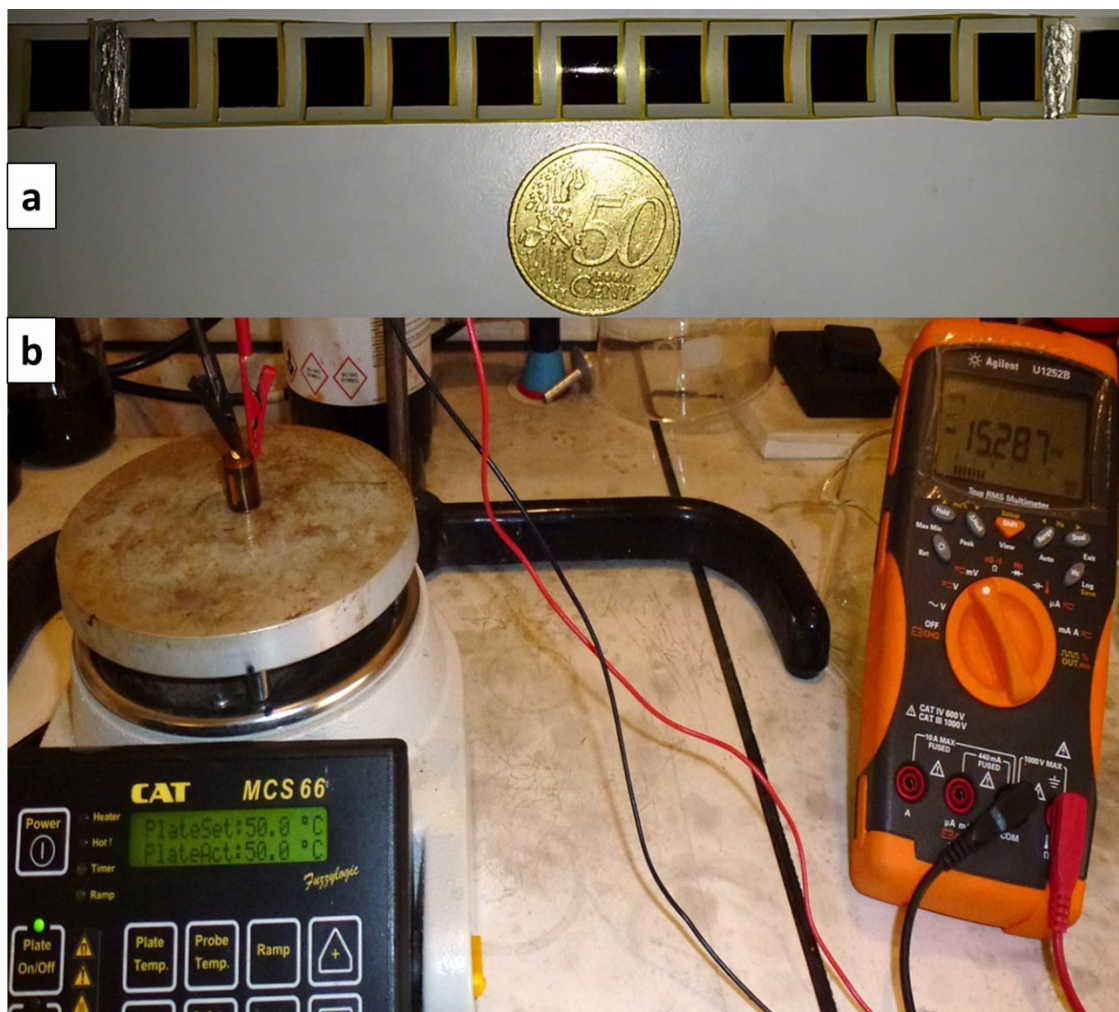

**Figure S7.** (a) Details of 2D PEDOT:OTf and silver thermocouples before rolling. (b) 156 rolled thermocouples used in real conditions on a hotplate. Here,  $R_i = 2,9 \text{ k}\Omega$  and due to poor thermal resistance between the hotplate and the TEG, the measured power on the picture is  $P_{OC} = 20 \text{ nW}$ .



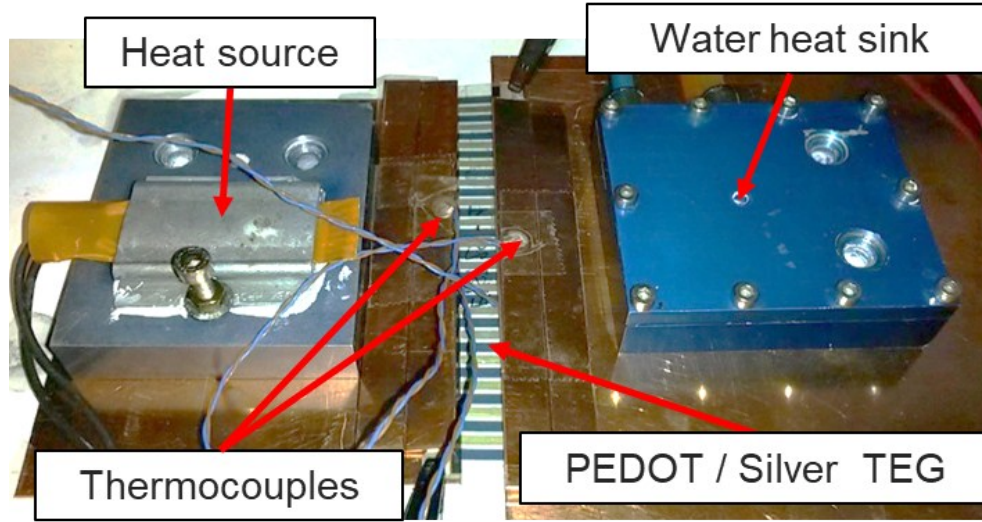

**Figure S8.** Thermoelectric generator power measurement bench. 2D TEG is thermalized with copper plate and a thermal gradient is applied between the heat source and the heat sink. Three thermocouples on the hot side are located under copper plate as close as possible of PEDOT-silver junctions. Two other thermocouples are located on the cold side which temperature remains at 23 °C maximum. A multimeter measures the open-circuit voltage ( $V_{OC}$ ) and by knowing the

internal resistance ( $R_i$ ), the maximal theoretical power output can be estimated ( $P_{oc} = \frac{V_{oc}^2}{4R_i}$ ).
